# Supplementary material for: A new method for large scale snow depth estimates using Sentinel-1 and ICESat-2
Source: Copernicus journal article supplement (doi:10.5194/egusphere-2024-3850), 2025-01-17
Supplement: Supplementary file 1 [file egusphere-2024-3850-supplement.pdf]

# Supplementary

## S1 Accuracy assessment

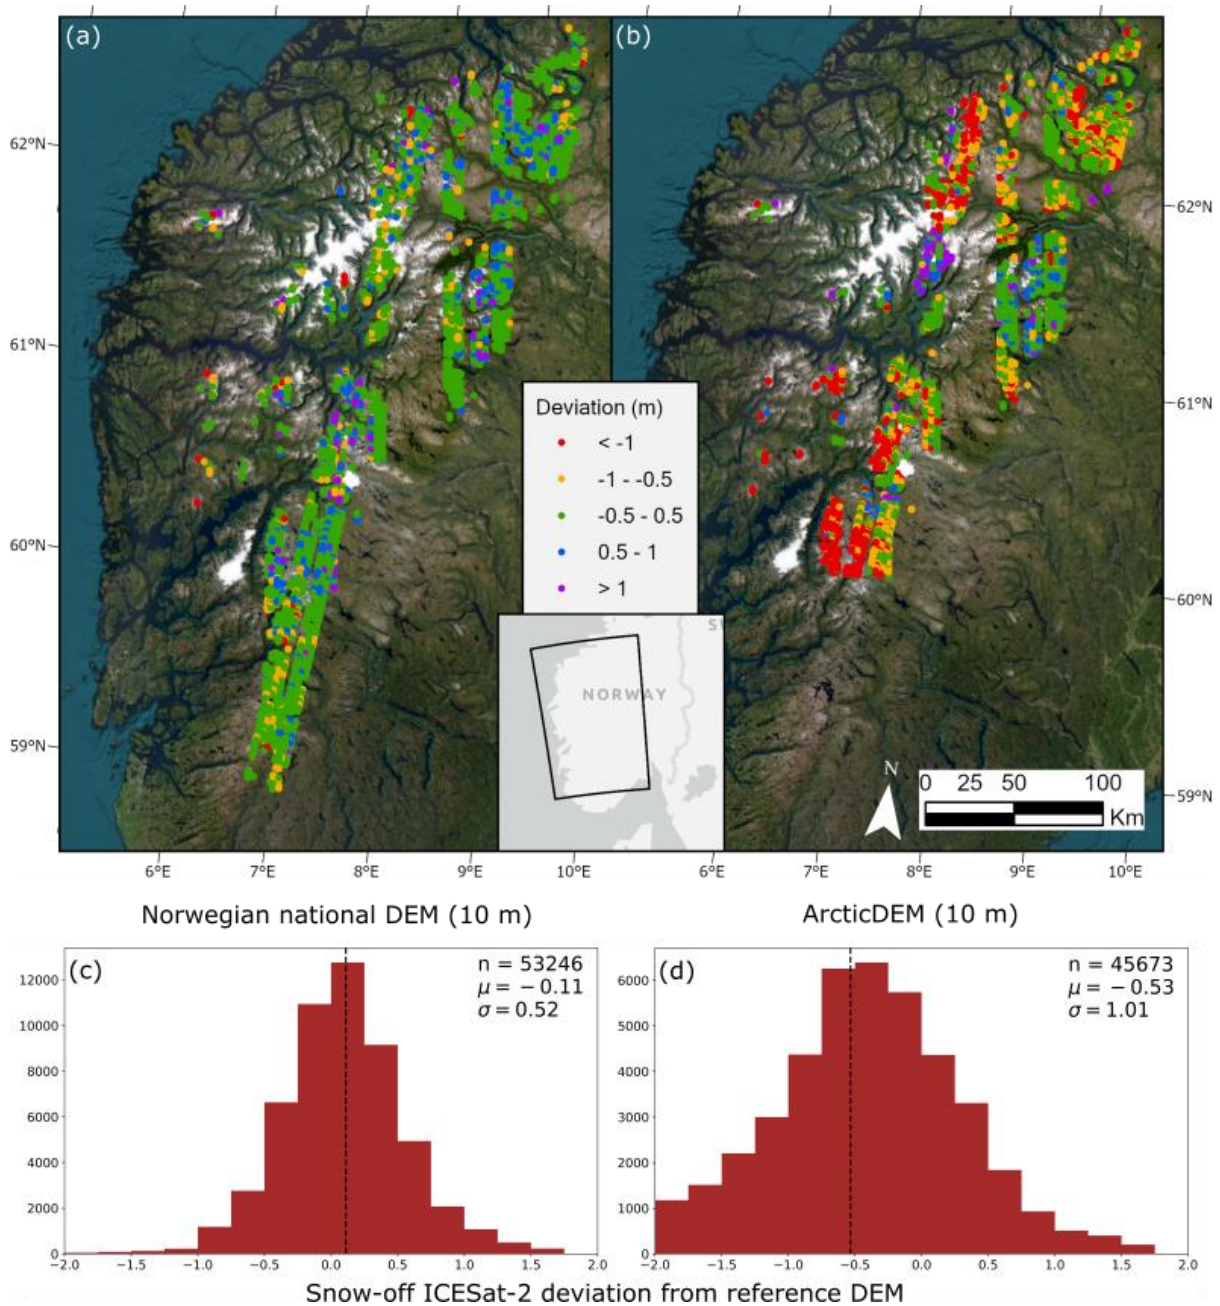

5 **Figure S1: ICESat-2 and reference DEM accuracy assessment:** Accuracy of ICESat-2 (500 meter smoothed) in snow-off conditions compared to (a) the Norwegian National DEM and (b) ArcticDEM mosaic. (c) Mean offset of -0.11 m and standard deviation of 0.52 between ICESat-2 and the Norwegian National DEM. (d) Mean offset of -0.53 and a standard deviation between ICESat-2 and ArcticDEM.

## S2 Sentinel-1 orbit correlations

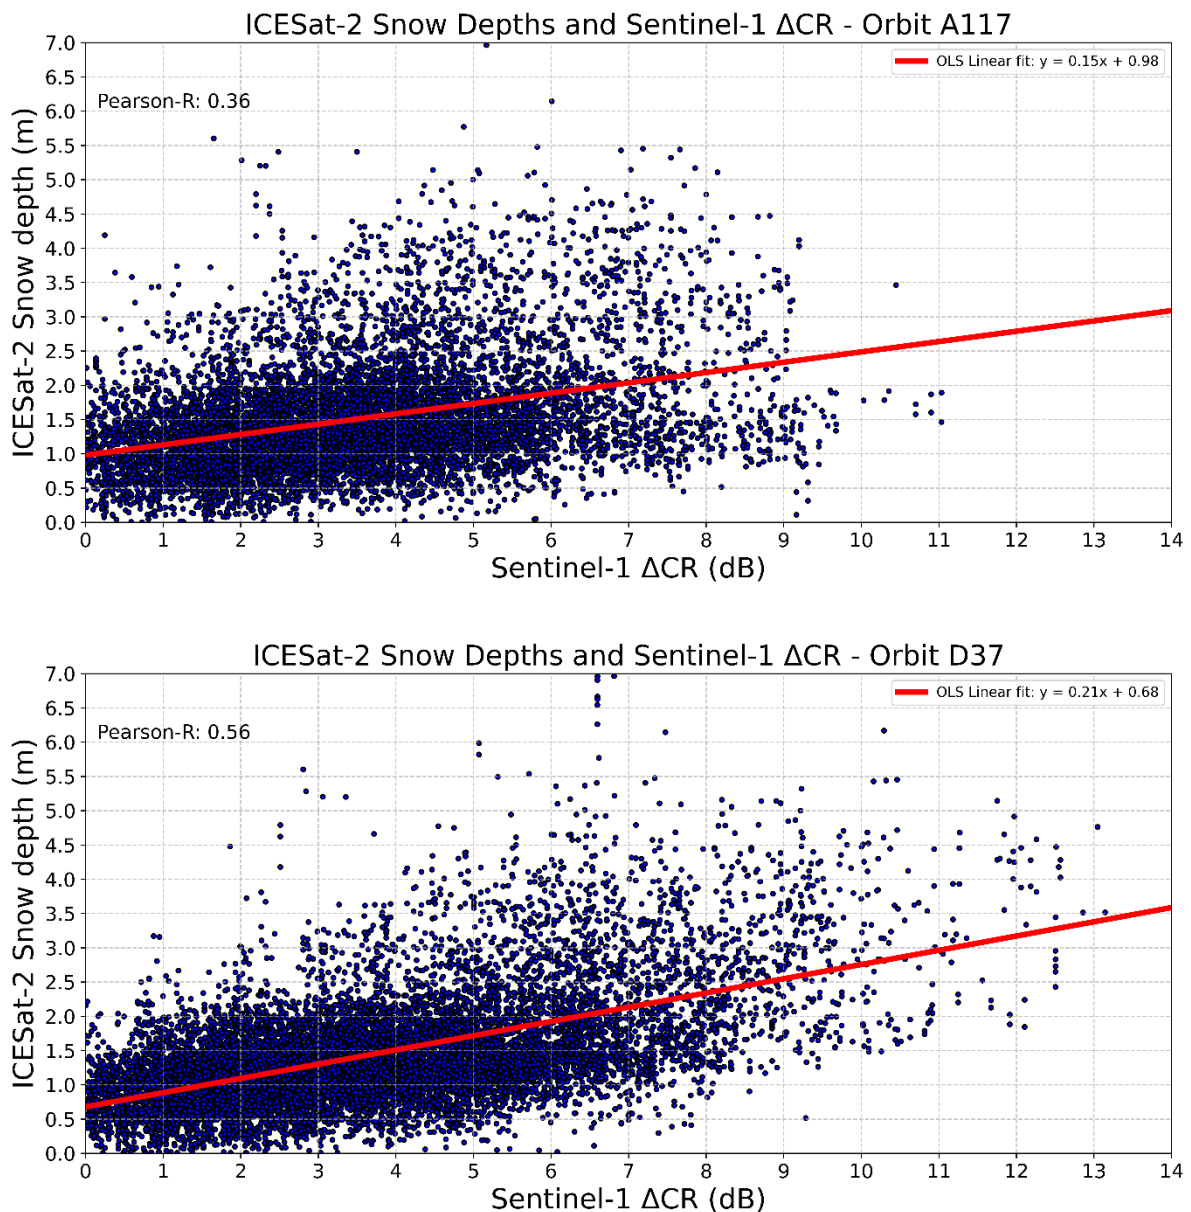

10

**Figure S2: OLS linear regression for orbit A117 and D37. (a)** Relationship between ICESat-2 snow depths and Sentinel-1  $\Delta$ CR for orbit A117. **(b)** Relationship between ICESat-2 snow depths and Sentinel-1  $\Delta$ CR for orbit D37.

## S3: Sentinel-1 orbit comparison

15

Since our Sentinel-1 derived snow depths are orbit specific, we are also comparing orbits with each other. We found a strong agreement between the descending orbits (Figure S3a), whereas the ascending orbit produced different snow depths (Figure S3b). We assume that the most accurate snow depths are derived from the descending orbits as they have a slightly stronger correlation with ICESat-2 compared to the ascending orbit and attribute this discrepancy between ascending and descending orbits related to the local incidence angle and overpass time. While  $\Delta$ CR is the difference between two images from the same orbit, we still consider local incidence angle to have a large effect on  $\Delta$ CR, as shadow effects from different viewing angles based on local topography will influence the intensity of backscatter. The path length of the signal travelling through a dry

20

snowpack can also vary significantly between ascending and descending orbits. We also theorize that overpass time influences the correlation between  $\Delta CR$  and snow depth. The descending orbits have an overpass time of 5 am, while ascending orbit has an overpass time of 5 pm, and is therefore more prone to  $\Delta CR$  being influenced by higher temperature fluctuations and undetected snow surface melt.

25

30

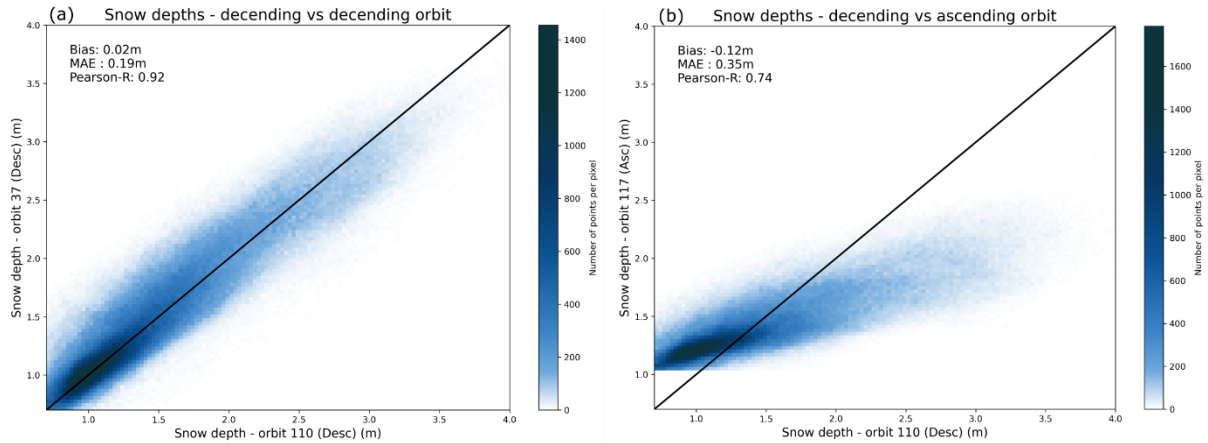

35 **Figure S3: Sentinel-1 Orbit comparison.** Descending orbits 110 & 37, shows a very strong correlation (a), while the correlation between descending orbit 110 and ascending orbit 117 (b) is relatively low.

### S4 Weather stations comparisons

Comparison between measured, modelled and Sentinel-1 snow depths at the location of each weather station.

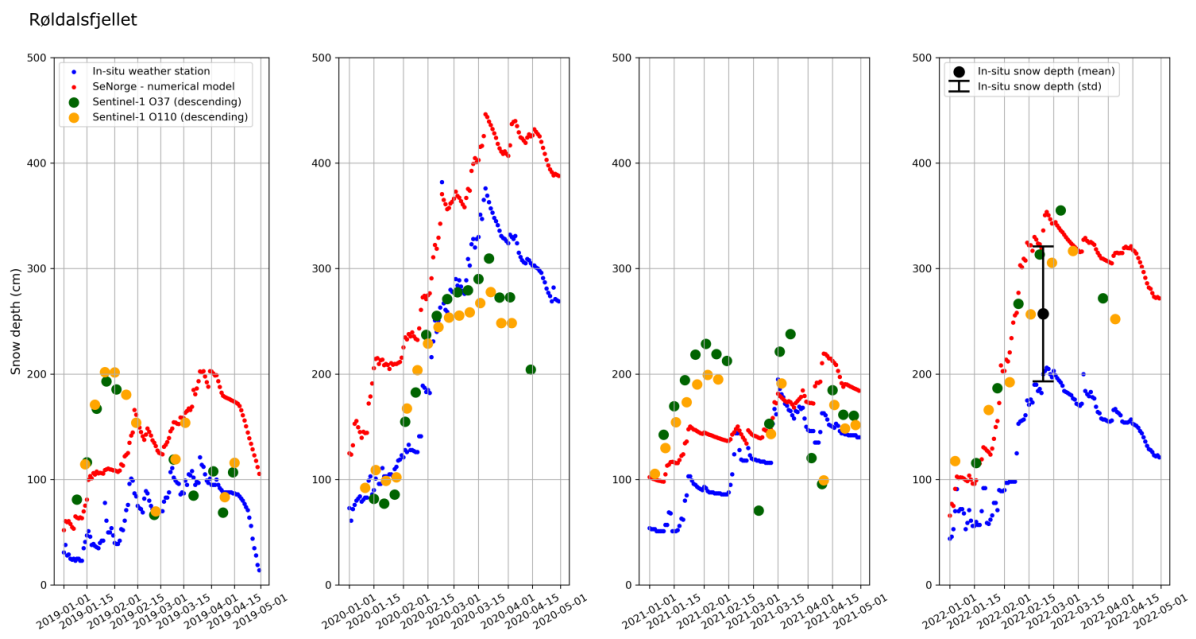

Haukeliseter Testfelt

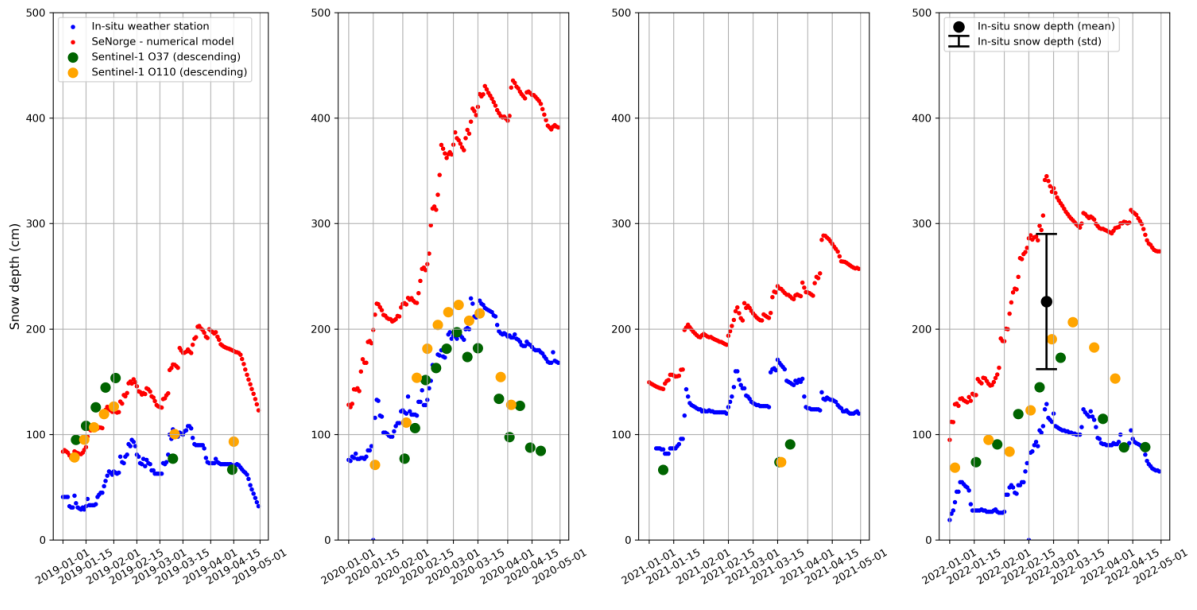

40

Rv7 Dyranut

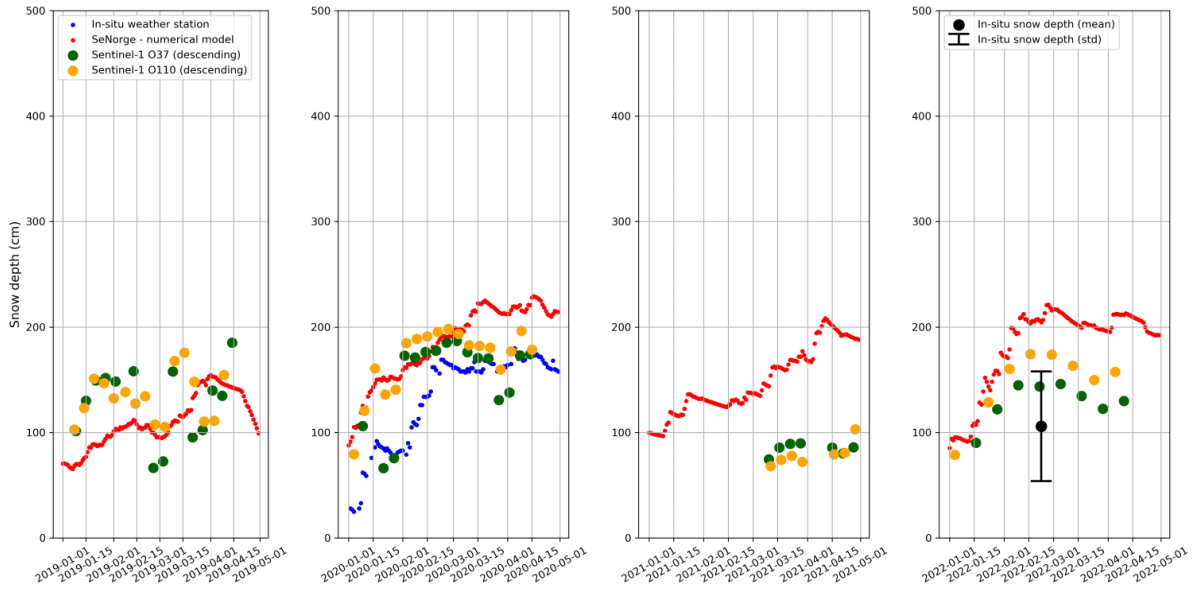

Sandhaug

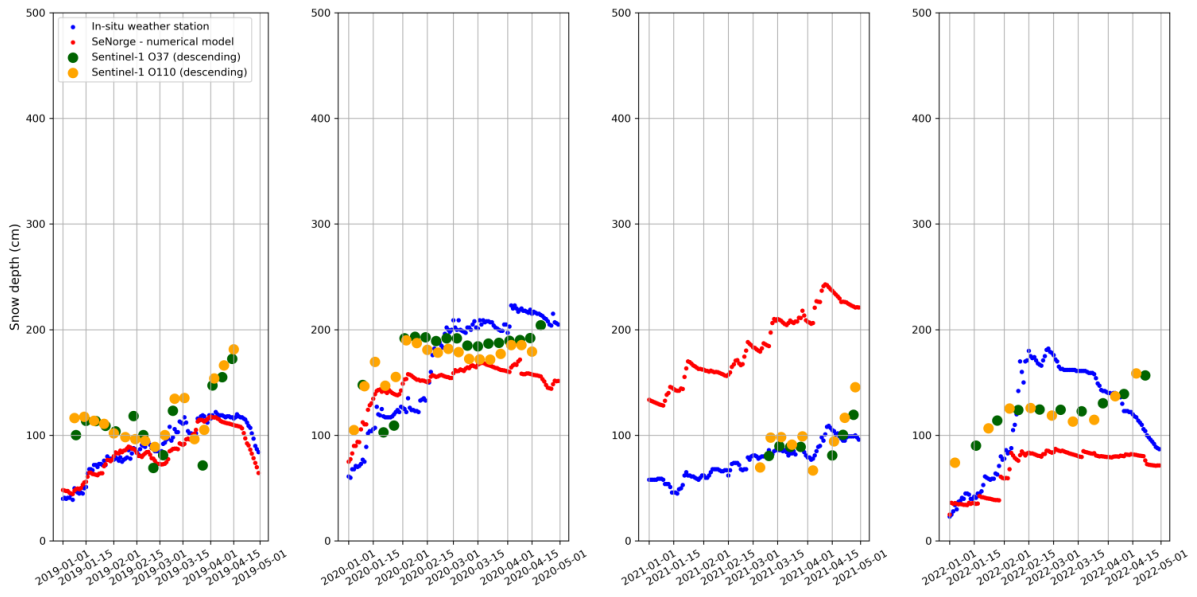

### Skurdevikåi

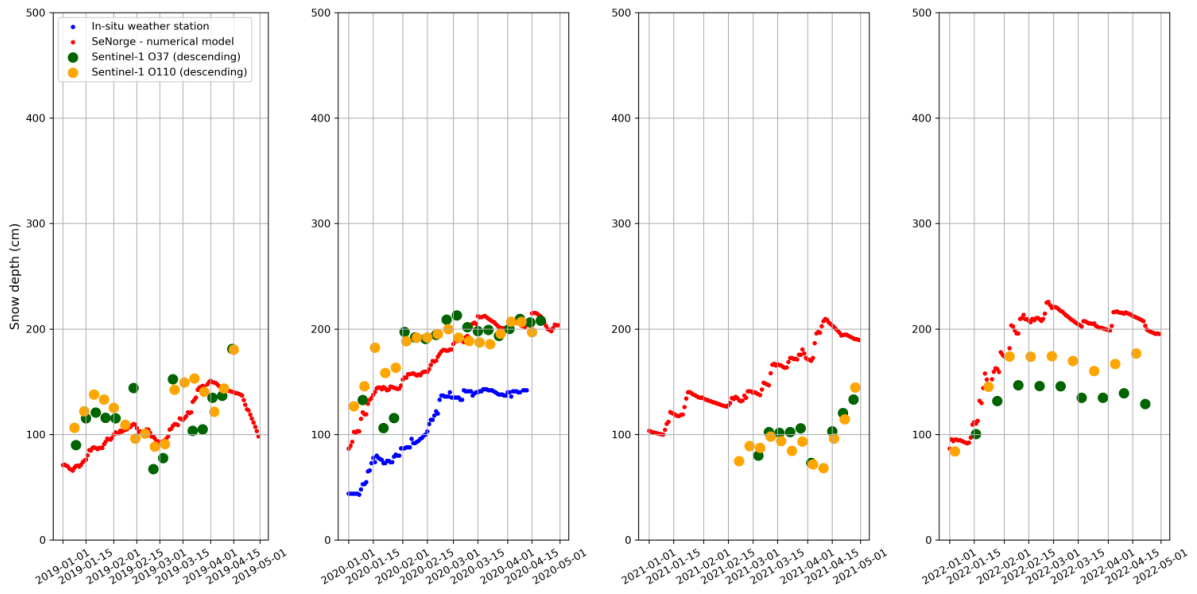

### Midtstova

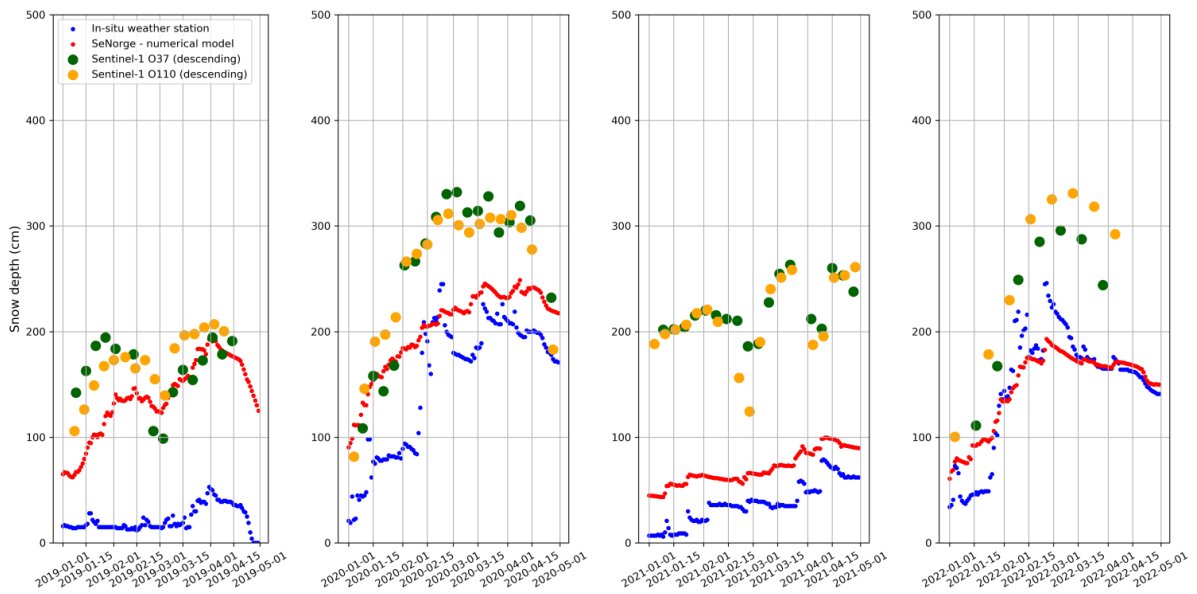

Finsevatn

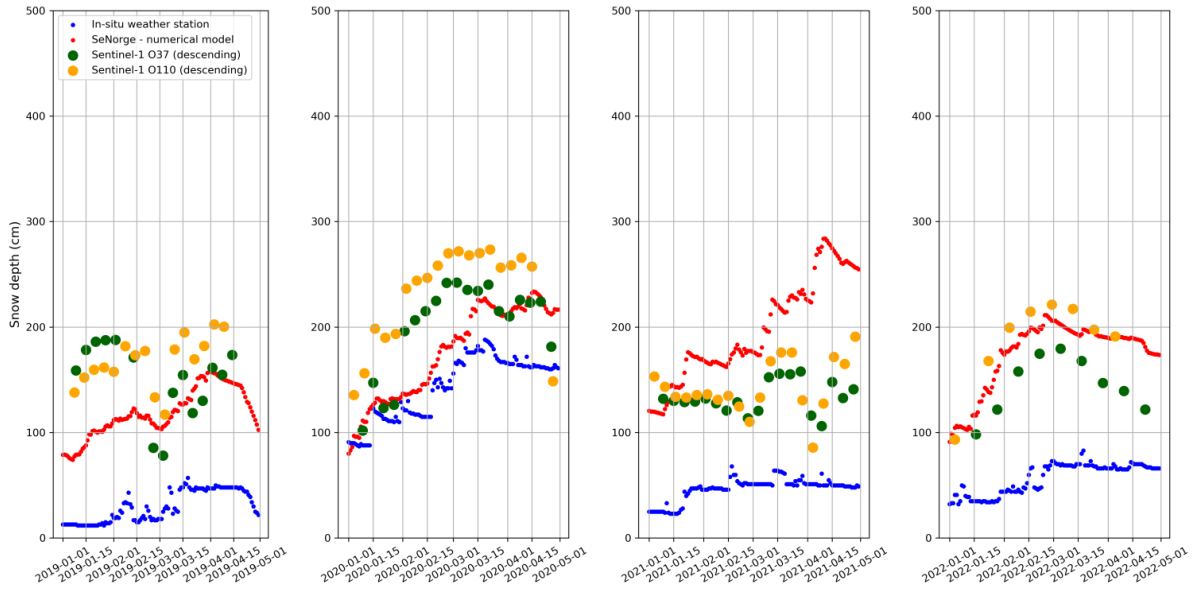

45

Fv51 Valdresflye

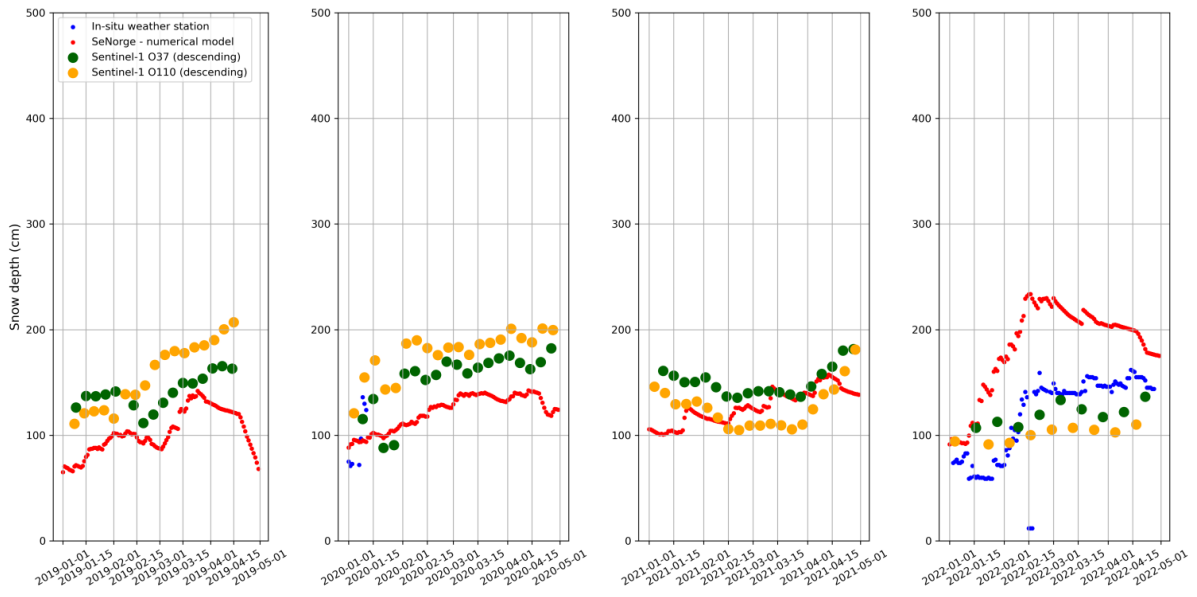

### Rv13 Vikafjell

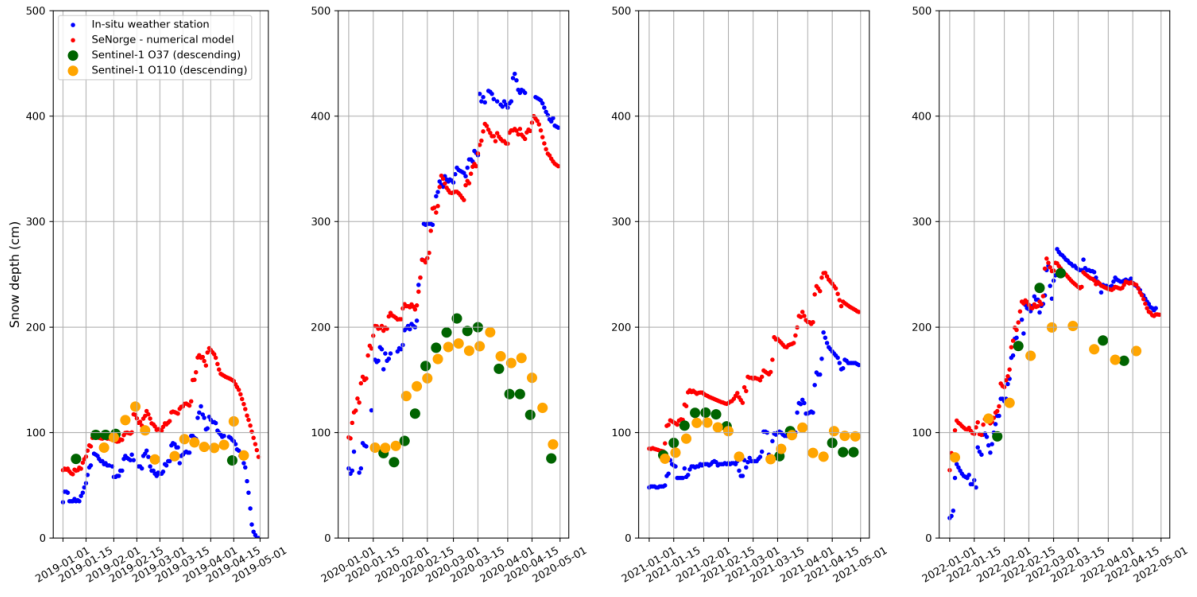

### Mannen

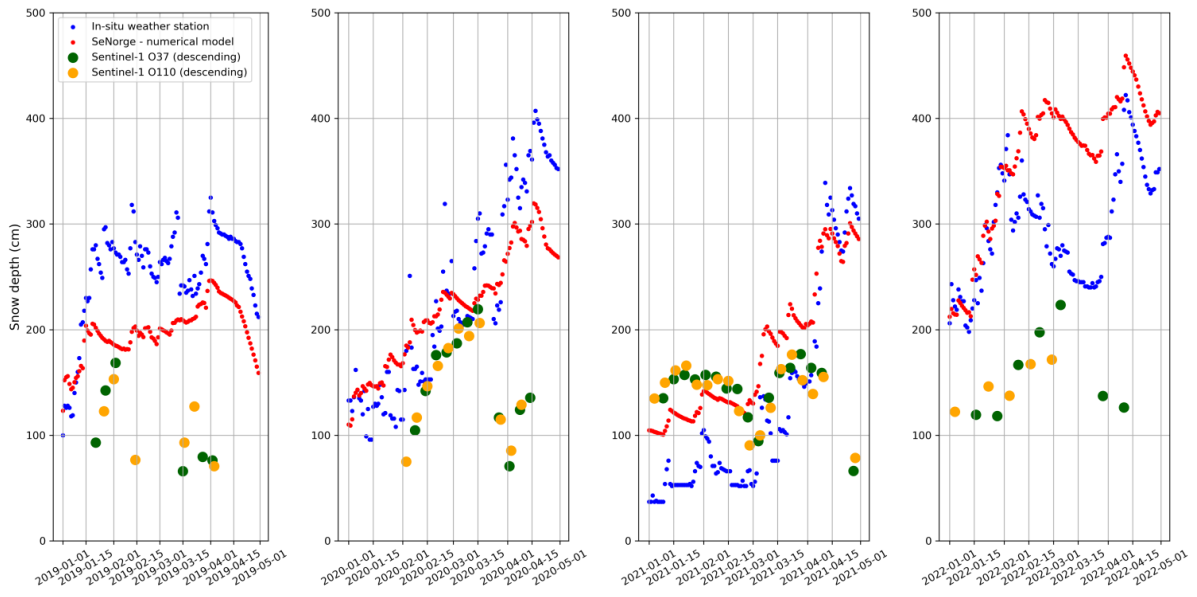



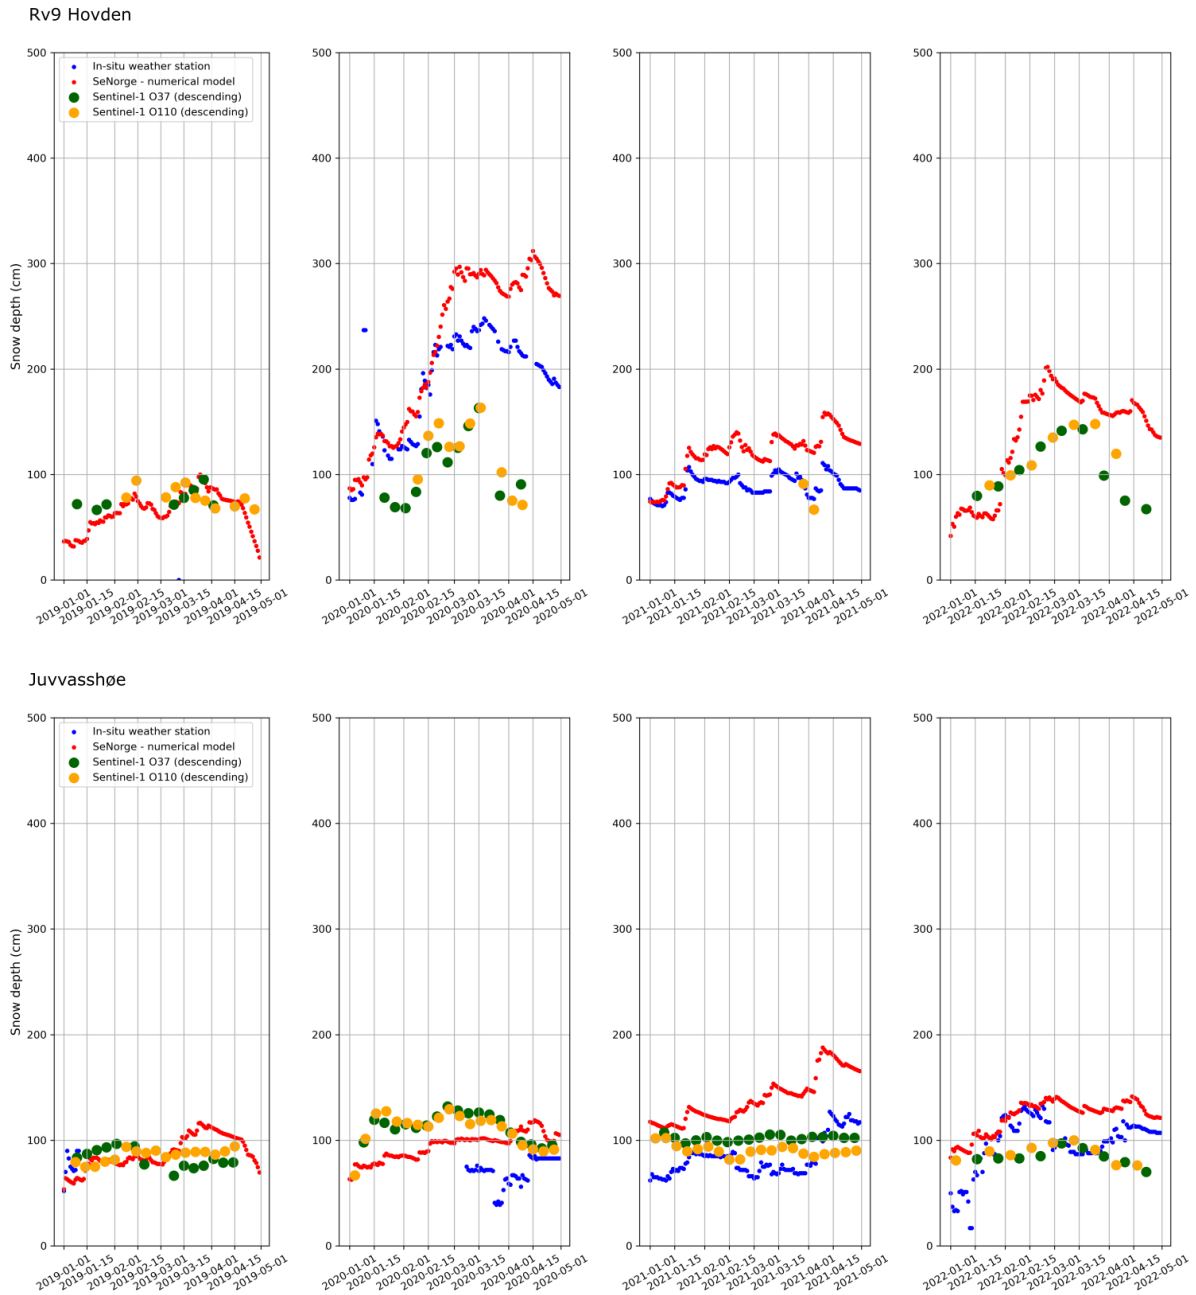

50

**Figure S4: Comparison of snow depths at the location of 12 weather stations. Sentinel-1 descending orbits 37 and 110 are compared to SeNorge and weather stations.**

**S5 Field trip snow depth measurements**

**Table S1. In situ snow depth measurements from our field trip. 279 snow depths were measured between 2022-02-21 and 2022-02-25 at seven locations.**

55

|             | Dyranut-1 | Dyranut-2 | Dyranut-3 | Røldal-1 | Røldal-2 | Haukeli-1 | Haukeli-2 |
|-------------|-----------|-----------|-----------|----------|----------|-----------|-----------|
| No. of obs. | 59        | 40        | 40        | 33       | 39       | 27        | 9         |

|                      |      |      |      |      |      |      |      |
|----------------------|------|------|------|------|------|------|------|
| <b>Mean (m)</b>      | 1.21 | 1.06 | 0.95 | 1.72 | 2.57 | 2.26 | 1.55 |
| <b>Std. dev. (m)</b> | 0.65 | 0.52 | 0.41 | 0.33 | 0.57 | 0.64 | 0.19 |
